# Supplementary material for: Durability of Humoral and Cellular Immunity after an Extended Primary Series with Heterologous Inactivated SARS-CoV-2 Prime-Boost and ChAdOx1 nCoV-19 in Dialysis Patients (ICON3)
Source: MDPI journal article supplement (doi:10.3390/vaccines10071064), 2022-07-01
Supplement: s1 [file s1]

**Supplementary Table S1.** Changes in HMI and CMI responses in patients treated with HD or PD and in control participants after completing COVID-19 vaccination with the extended primary series, composed of a heterologous inactivated SARS-CoV-2 prime-boost and ChAdOx1 nCoV-19 vaccine as the third dose, beginning from baseline (M0) and continuing through 3 months (M3) and 6 months (M6) after vaccination.

| Variable                                                          | HD                   | PD                    | Control              |
|-------------------------------------------------------------------|----------------------|-----------------------|----------------------|
| N (%) or mean (SD)                                                | (n = 29)             | (n = 28)              | (n = 14)             |
| Percent change in anti-RBD IgG titer from M0 to M3 [%], mean (SD) | −59.5%***<br>(27.9%) | −69.1%<br>(17.1%)     | −80.2%<br>(11%)      |
| Percent change in anti-RBD IgG titer from M0 to M6 [%], mean (SD) | −76.7%<br>(18.7%)    | −84.1%<br>(9.6%)      | N/A                  |
| Percent change in sVNT from M0 to M3 [%], median (IQR)            | −6%<br>(−15% to −1%) | −5%<br>(−20% to −2%)  | −6%<br>(−16% to −2%) |
| Percent change in sVNT from M0 to M6 [%], median (IQR)            | −8%<br>(−15% to −1%) | −13%<br>(−30% to −5%) | N/A                  |

|                                                                               |                      |                       |     |
|-------------------------------------------------------------------------------|----------------------|-----------------------|-----|
| Percent change in S1-specific T-cell response from M0 to M6 [%], median (IQR) | 6%<br>(-77% to 329%) | 14%<br>(-43% to 170%) | N/A |
|-------------------------------------------------------------------------------|----------------------|-----------------------|-----|

\*\*\*  $p < 0.05$  (compared with control participants)

*CMI*, cell-mediated immunity; *HD*, hemodialyzed patients; *HMI*, humoral-mediated immunity; *IgG*, immunoglobulin G; *IQR*, interquartile range; *N*, number; *N/A*, not applicable; *PD*, peritoneal dialyzed patients; *RBD*, receptor-binding domain; *SD*, standard deviation; *sVNT*, surrogate virus neutralization test.
